# Supplementary material for: Genome-wide identification of the MAPK gene family in turbot and its involvement in abiotic and biotic stress responses
Source: Frontiers journal article supplement (doi:10.3389/fmars.2022.1005401), 2022-09-27
Supplement: Table_5.XLSX [file Table_5.XLSX]

## Sheet: Sheet1
seq id	alignment start	alignment end	envelope start	envelope end	hmm acc	hmm name	hmm start	hmm end	hmm length	bit score	Individual E-value	Conditional E-value	database significant	outcompeted	clan
MAPK12a	42	313	40	313	PF00069.28	Pkinase	14	264	264	206.32	5.7e-61	1.2e-64	1	0	CL0016
MAPK12a	48	254	37	270	PF07714.20	PK_Tyr_Ser-Thr	24	232	259	93.01	1.9e-26	4e-30	1	1	CL0016
MAPK12a	108	193	79	198	PF03109.19	ABC1	144	230	244	32.01	6.9e-08	1.4e-11	1	1	CL0016
MAPK12a	107	184	40	191	PF01163.25	RIO1	81	159	188	22.44	8e-05	1.6e-08	1	1	CL0016
MAPK12b	25	309	25	309	PF00069.28	Pkinase	1	264	264	222.79	5.4e-66	8.3e-70	1	0	CL0016
MAPK12b	29	229	26	244	PF07714.20	PK_Tyr_Ser-Thr	5	211	259	95.77	2.8e-27	4.3e-31	1	1	CL0016
MAPK12b	101	189	49	194	PF03109.19	ABC1	141	230	244	29.86	3.1e-07	4.8e-11	1	1	CL0016
MAPK13	23	305	23	305	PF00069.28	Pkinase	1	264	264	230.28	2.8e-68	4.3e-72	1	0	CL0016
MAPK13	26	241	23	247	PF07714.20	PK_Tyr_Ser-Thr	4	227	259	98.72	3.5e-28	5.4e-32	1	1	CL0016
MAPK13	133	185	100	191	PF03109.19	ABC1	178	230	244	26.03	4.6e-06	7.1e-10	1	1	CL0016
MAPK11	23	307	23	307	PF00069.28	Pkinase	1	264	264	211.3	1.7e-62	3.5e-66	1	0	CL0016
MAPK11	27	244	23	262	PF07714.20	PK_Tyr_Ser-Thr	5	228	259	102.69	2.2e-29	4.4e-33	1	1	CL0016
MAPK11	101	188	69	195	PF03109.19	ABC1	143	231	244	27.26	2e-06	4e-10	1	1	CL0016
MAPK11	41	171	15	178	PF06293.17	Kdo	31	169	207	23.77	2.7e-05	5.6e-09	1	1	CL0016
MAPK14	25	181	25	192	PF00069.28	Pkinase	1	153	264	109.6	1.8e-31	1.9e-35	1	0	CL0016
MAPK14	207	350	200	350	PF00069.28	Pkinase	138	264	264	90.97	8.8e-26	8.9e-30	1	0	CL0016
MAPK14	29	182	25	193	PF07714.20	PK_Tyr_Ser-Thr	5	159	259	64.72	8.3e-18	8.4e-22	1	1	CL0016
MAPK14	207	277	202	306	PF07714.20	PK_Tyr_Ser-Thr	143	218	259	25.51	7.6e-06	7.8e-10	1	1	CL0016
MAPK9	24	319	24	319	PF00069.28	Pkinase	1	264	264	216.63	4.1e-64	8.3e-68	1	0	CL0016
MAPK9	27	234	24	264	PF07714.20	PK_Tyr_Ser-Thr	4	217	259	105.02	4.2e-30	8.6e-34	1	1	CL0016
MAPK9	53	169	49	177	PF06293.17	Kdo	42	167	207	24.9	1.2e-05	2.5e-09	1	1	CL0016
MAPK9	101	177	79	183	PF03109.19	ABC1	142	220	244	23.23	3.3e-05	6.8e-09	1	1	CL0016
MAPK10	67	362	67	362	PF00069.28	Pkinase	1	264	264	214.78	1.5e-63	3.1e-67	1	0	CL0016
MAPK10	70	261	67	301	PF07714.20	PK_Tyr_Ser-Thr	4	200	259	99.23	2.4e-28	5e-32	1	1	CL0016
MAPK10	89	211	74	219	PF06293.17	Kdo	35	166	207	23.5	3.3e-05	6.7e-09	1	1	CL0016
MAPK8a	70	365	70	365	PF00069.28	Pkinase	1	264	264	219.83	4.3e-65	8.8e-69	1	0	CL0016
MAPK8a	73	283	70	312	PF07714.20	PK_Tyr_Ser-Thr	4	220	259	105.36	3.3e-30	6.7e-34	1	1	CL0016
MAPK8a	147	220	126	224	PF03109.19	ABC1	142	217	244	24.77	1.1e-05	2.3e-09	1	1	CL0016
MAPK8a	87	215	70	223	PF06293.17	Kdo	30	167	207	26.33	4.5e-06	9.2e-10	1	1	CL0016
MAPK8b	26	321	26	321	PF00069.28	Pkinase	1	264	264	217.67	2e-64	4e-68	1	0	CL0016
MAPK8b	29	220	26	266	PF07714.20	PK_Tyr_Ser-Thr	4	200	259	101.98	3.6e-29	7.3e-33	1	1	CL0016
MAPK8b	42	171	26	179	PF06293.17	Kdo	29	167	207	27.92	1.5e-06	3e-10	1	1	CL0016
MAPK8b	102	176	80	180	PF03109.19	ABC1	141	217	244	24.65	1.2e-05	2.5e-09	1	1	CL0016
MAPK7	68	360	68	360	PF00069.28	Pkinase	1	264	264	236.32	4e-70	4.1e-74	1	0	CL0016
MAPK7	70	270	68	287	PF07714.20	PK_Tyr_Ser-Thr	3	200	259	111.85	3.5e-32	3.5e-36	1	1	CL0016
MAPK3	56	344	56	344	PF00069.28	Pkinase	1	264	264	228.46	1e-67	1e-71	1	0	CL0016
MAPK3	61	255	57	296	PF07714.20	PK_Tyr_Ser-Thr	6	201	259	116.39	1.4e-33	1.5e-37	1	1	CL0016
MAPK1	36	324	36	324	PF00069.28	Pkinase	1	264	264	235.44	7.5e-70	7.6e-74	1	0	CL0016
MAPK1	41	235	37	266	PF07714.20	PK_Tyr_Ser-Thr	6	201	259	122.8	1.6e-35	1.6e-39	1	1	CL0016
MAPK6	20	316	20	316	PF00069.28	Pkinase	1	264	264	236.93	2.6e-70	2.7e-74	1	0	CL0016
MAPK6	24	247	21	273	PF07714.20	PK_Tyr_Ser-Thr	5	221	259	86.47	1.9e-24	2e-28	1	1	CL0016
MAPK4	22	311	19	311	PF00069.28	Pkinase	4	264	264	217.57	2.1e-64	2.1e-68	1	0	CL0016
MAPK4	23	259	20	279	PF07714.20	PK_Tyr_Ser-Thr	5	238	259	88.01	6.5e-25	6.6e-29	1	1	CL0016
MAPK15	21	312	21	312	PF00069.28	Pkinase	1	264	264	242.58	5e-72	5.1e-76	1	0	CL0016
MAPK15	22	249	21	254	PF07714.20	PK_Tyr_Ser-Thr	2	229	259	126.94	8.6e-37	8.7e-41	1	1	CL0016
